# Supplementary material
Source: PubMed Central journal article supplement (PMC3989431)
Supplement: NIHMS543291-supplement-a.pdf [file NIHMS543291-supplement-a.pdf]

|         |          |                            | AG    | RA    | ANT   |
|---------|----------|----------------------------|-------|-------|-------|
| 1771B   | [Φ2]wp-4 | FGNGLIPFPRV a              | 3.0   | 81.1  | 15.9  |
| 1749    | [Φ1]wp-4 | TGPSASSGLWFGPRL a          | 91.5  | 0.3   | 8.1   |
| 1750    | [Φ1]wp-3 | SVPFKPRL a                 | 83.2  | 7.7   | 9.1   |
| 1735    | [Φ1]wp-3 | SPISSVGLFPFPRV a           | 2.0   | 84.5  | 13.5  |
| 1736    | [Φ1]wp-4 | NGGGGDGGGLWFGPRL a         | 92.9  | 0.4   | 6.7   |
| 1665    | [Φ1]wp-2 | SPPFAPRL a                 | 99.9  | 1.7   | -1.6  |
| 1720    | [Φ1]wp-3 | NDVKDGAASGAHSDRLGLWFGPRL a | 81.3  | 13.8  | 4.9   |
| 1217    | [Φ1]wp-3 | GAVPAAQFSPRL a             | 79.2  | 25.0  | -4.3  |
| 1417    | [Φ3]wp-3 | AGPSATTVWFGPRL a           | 83.5  | 6.2   | 10.3  |
| 1437    | [Φ1]wp-3 | NGSAGNGGLWFGPRL a          | 69.0  | 14.4  | 16.6  |
| 1490    | [Φ1]wp-3 | FFLKIKTKNVPRL a            | 17.0  | 30.9  | 52.0  |
| 1229    | [Φ1]wp-5 | !SVPTTFTPRL a              | 95.1  | 14.4  | -9.6  |
| TcCAPA2 |          | RIGKMVSFPRI a              | 17.2  | 94.1  | -11.2 |
| TcPK2-1 |          | HVVNFPTPRL a               | 100.0 | 2.6   | -2.6  |
| TcPK2-3 |          | HSSPFSPRL a                | 98.0  | 3.7   | -1.7  |
| MsPBAN  |          | DTRTRYFSPRL a              | 98.0  | 7.6   | -5.5  |
| TcETH1  |          | ENYVLKAAKKNVPR I a         | 6.1   | 116.8 | -22.8 |
| TcETH2  |          | FFMKASKSVPR I a            | 8.9   | 103.8 | -12.7 |

|      |           |              |       |      |       |
|------|-----------|--------------|-------|------|-------|
| 1765 | [Φ1]wp-3  | APFSPRL a    | 104.8 | 0.3  | -5.0  |
| 1768 | [Φ1]wp-2  | FYAPFSPRL a  | 106.6 | 0.2  | -6.8  |
| 1738 | [Φ1]wp-1  | LGLWGGPRL a  | 104.6 | 1.3  | -5.9  |
| 1739 | [Φ1]wp-2  | RIGLWFGPRL a | 98.1  | 0.7  | 1.2   |
| 1737 | [Φ1]wp-2  | GLWFGPRL a   | 102.4 | 1.9  | -4.3  |
| 1640 | [Φ2]wp-2  | LWFGPR a     | 17.5  | 41.5 | 41.0  |
| 1641 | [Φ1]wp-2  | GPRL a       | 3.2   | 70.6 | 26.1  |
| 1642 | [Φ1]wp-3  | FGPRL a      | 54.7  | 32.0 | 13.3  |
| 1643 | [Φ1]wp-1  | WFGPRL a     | 112.8 | 0.6  | -13.5 |
| 1673 | [Φ1]wp-2  | LWFGP a      | 1.5   | 74.1 | 24.4  |
| 1674 | [Φ1]wp-3  | LWFGPR       | 2.6   | 82.8 | 14.6  |
| 1619 | [Φ1]wp-22 | LWFGPRL a    | 109.4 | 3.0  | -12.4 |
| 1615 | [Φ1]wp-3  | AWFGPRL a    | 116.7 | 7.4  | -24.1 |
| 1617 | [Φ1]wp-3  | LAFGPRL a    | 75.3  | 7.2  | 17.5  |
| 1618 | [Φ1]wp-2  | LWAGPRL a    | 83.1  | 19.3 | -2.5  |
| 1614 | [Φ1]wp-2  | LWFAAPRL a   | 115.3 | 4.2  | -19.5 |
| 1620 | [Φ1]wp-2  | LWFGARL a    | 73.1  | 12.7 | 14.2  |
| 1621 | [Φ1]wp-2  | LWFGPAL a    | 2.1   | 72.5 | 25.4  |
| 1622 | [Φ1]wp-3  | LWFGPRA a    | 12.3  | 61.6 | 26.1  |

|        |          |                |       |      |       |
|--------|----------|----------------|-------|------|-------|
| 1780   | [Φ1]wp-2 | 1 W4G6RRL a    | 4.6   | 56.5 | 38.9  |
| 1781   | [Φ3]wp-2 | 1 L^FG6RRL a   | 2.4   | 98.7 | -1.2  |
| 1782   | [Φ2]wp-2 | 1 LW4G6RRL a   | 32.3  | 44.4 | 23.3  |
| 1783   | [Φ1]     | 1 LWFG6RRL a   | 6.1   | 71.4 | 22.5  |
| 1784   | [Φ2]wp-1 | 1 LW4GPRL a    | 96.3  | 1.4  | 2.3   |
| 1629   | [Φ3]wp-2 | 1 YAT6RRL a    | 4.3   | 95.9 | -0.2  |
| 1630   | [Φ1]wp-2 | 1 YFT6RA a     | 4.9   | 88.7 | 6.3   |
| 1609-2 | [Φ1]wp-2 | 1 YF56RRL a    | 32.5  | 50.9 | 16.6  |
| 1697   | [Φ2]wp-4 | # FTPRL a      | 111.9 | 7.5  | -19.4 |
| 1740   | [Φ1]wp-2 | 0 GLWFGPRL     | 3.9   | 77.6 | 18.6  |
| 1499   | [Φ1]wp-1 | 1 GLWFG\$RRL a | 68.9  | 15.3 | 15.8  |
| 1551   | [Φ1]wp-2 | 1 Y4T6RRL a    | 80.8  | 13.3 | 5.9   |
| 1610-2 | [Φ1]     | 1 Y45PRL a     | 105.9 | 7.5  | -13.4 |

|        |           |              |       |      |       |
|--------|-----------|--------------|-------|------|-------|
| 1902   | [Φ1] wp-2 | 2 FKPRL a    | 124.7 | 1.0  | -25.8 |
| 1903   | [Φ1] wp-1 | 2 FVPRL a    | 111.7 | 1.9  | -13.7 |
| 1894   | [Φ1] wp-4 | 2 FSTRL a    | 3.5   | 72.7 | 23.8  |
| 1895   | [Φ2] wp-1 | 2 FGPRL a    | 124.7 | 0.0  | -24.7 |
| 1896   | [Φ2] wp-2 | 2 FTPRI a    | 4.5   | 92.6 | 2.8   |
| 1868   | [Φ8] wp-2 | 2 4KPRL a    | 107.0 | 4.6  | -11.6 |
| 1790   | [Φ1]      | 2 LWAA5PRL a | 3.5   | 67.1 | 29.5  |
| 1791   | [Φ5] wp-1 | 3 LWAA5PRL a | 100.8 | 2.9  | -3.8  |
| 1608-2 | [Φ1] wp-1 | 2 F56RRL a   | 3.7   | 83.3 | 12.9  |
| 1631   | [Φ6] wp-2 | 2 TF6RRL a   | 78.3  | 11.0 | 10.7  |
| 1477   | [Φ3] wp-3 | 2 AGPRL a    | 103.2 | 0.6  | -3.8  |
| 1478   | [Φ1] wp-2 | 2 AGPRA a    | 4.4   | 89.7 | 5.8   |
| 1604   | [Φ1] wp-2 | 2 F5PRA a    | 3.6   | 64.5 | 31.8  |
| 1605   | [Φ5] wp-2 | 3 AA5PRL a   | 4.9   | 74.8 | 20.3  |
| 1525   | [Φ1] wp-2 | 2 AAAA5PRL a | 4.7   | 72.6 | 22.7  |
| 1607   | [Φ8] wp-1 | 2 45PRL a    | 89.4  | 6.4  | 4.1   |
| 1535   | [Φ4] wp-2 | 2 F9PRL a    | 118.1 | 1.5  | -19.6 |
| 1534   | [Φ4] wp-2 | 2 F8PRL a    | 144.1 | 4.6  | -48.7 |

AC = 1  
 7Abf-Suc = 2  
 Hex-Suc = 3  
 [βF] = 4  
 [dF] = 5  
 [β3P] = 6  
 [dR] = 7  
 [dA] = 8  
 [dR] = 9  
 pQ = !  
 [Aib-Aib-Aib-Aib] = #  
 Cyclo[] = 0  
 [Hyp] = \$  
 [β3W] = ^
