# Supplementary material
Source: PubMed Central journal article supplement (PMC3989431)
Supplement: NIHMS543291-supplement-b.pdf [file NIHMS543291-supplement-b.pdf]

**Table S2.** Comparison of our *in vitro* data with previous *in vivo* data.

| Chemical ID | Sequence information         | AG (%) | ANT (%) | <i>In vivo</i> activity (%) |                                                                                      |
|-------------|------------------------------|--------|---------|-----------------------------|--------------------------------------------------------------------------------------|
| 1737        | GLWFGPRLa                    | 100    | -4.3    | ~80                         |                                                                                      |
| 1640        | LWFGPRa                      | 17.5   | 41      | >30                         |                                                                                      |
| 1641        | GPRLa                        | 3.2    | 26.2    | ~10, N                      |                                                                                      |
| 1642        | FGPRLa                       | 54.7   | 13.3    | ~10, N                      |                                                                                      |
| 1643        | WGFGPRLa                     | 112.8  | -13.4   | No data                     |                                                                                      |
| 1673        | LWFGPa                       | 1.5    | 24.4    | ~5, N                       |                                                                                      |
| 1674        | LWFGR-                       | 2.6    | 14.6    | No data                     |                                                                                      |
| 1619        | LWFGPRLa                     | 109.4  | -12.4   | >55                         | <i>In vivo</i> activity on breaking pupal diapauses in <i>H.zea</i> (reference 28)   |
| 1615        | AWFGPRLa                     | 116.7  | -24.1   | ~20, N                      |                                                                                      |
| 1617        | LAFGPRLa                     | 75.3   | 17.5    | ~12, N                      |                                                                                      |
| 1618        | LWAGPRLa                     | 83.1   | -2.4    | ~20, N                      |                                                                                      |
| 1614        | LWFA PRLa                    | 115.3  | -19.5   | ~60                         |                                                                                      |
| 1620        | LWFGA RLa                    | 73.1   | 14.2    | >20, N                      |                                                                                      |
| 1621        | LWFGPA La                    | 2.1    | 25.4    | <10, N                      |                                                                                      |
| 1622        | LWFGPRA a                    | 12.3   | 26.1    | <10, N                      |                                                                                      |
| 1720 (HzDH) | NDVKDGAASGAHSDRLGLWFGPRLa    | 81.3   | 4.9     | ~95                         |                                                                                      |
| 1902        | 2Abf-Suc-FKPRLa              | 124.7  | -25.7   | ~85                         |                                                                                      |
| 1903        | 2Abf-Suc-FVPRLa              | 111.7  | -13.6   | ~75                         |                                                                                      |
| 1894        | 2Abf-Suc-FSTRLa              | 3.5    | 23.8    | ~40                         | <i>In vivo</i> activity on preventing pupal diapauses in <i>H.zea</i> (reference 27) |
| 1895        | 2Abf-Suc-FGPRLa              | 124.7  | -24.7   | ~30                         |                                                                                      |
| 1896        | 2Abf-Suc-FTPRIa              | 4.5    | 2.9     | ~40                         |                                                                                      |
| 1868        | 2Abf-Suc-[ $\beta^3$ F]KPRLa | 107.0  | -11.6   | ~40                         |                                                                                      |
| 1477        | 2Abf-Suc-AGPRLa              | 103.2  | -3.8    | ~40                         |                                                                                      |
| 1720 (HzDH) | NDVKDGAASGAHSDRLGLWFGPRLa    | 81.3   | 4.9     | ~50                         |                                                                                      |
