# Supplementary material
Source: PubMed Central journal article supplement (PMC3989431)
Supplement: NIHMS543291-supplement.pdf [file NIHMS543291-supplement.pdf]

1 ATGAGTCCCATCAGTGAGGTGGCCAACCTTGACCGCAACACCTCAGAACAGTTGACCCACGGTCATCTTCGGC  
1 M S P I S E V A N L T G N T S E P V D P T V I F G  
76 CCTCAGAGAGACTCCCTCTTCATCGTGCTACCTGTCACTATCGTATATGCACTTATATTCATAACGGGGCTTCTA  
26 P Q R D S L F I V L P V T I V Y A L I F I T G L L  
151 GGCAACATATTTACATGCCTAGTGATAGTCCGGAACAAAAGTATGCACACTGCAACAAATTATTTATTTAGT  
51 G N I F T C L V I V R N K S M H T A T N Y Y L F S  
226 TTAGCTATATCAGATCTCCTTTTACTTATAAGTGGAAATGCCCCAGGAGATGTATTCAATATGGTCAAAGTGGCCG  
76 L A I S D L L L L I S G M P Q E M Y S I W S K W P  
301 TATGTGTTTGGACACAGTTTTTGTGTGATTAGAGATTAGCAGCTGAGGCGTCAACGAATGCCAGTGTTTTGAGC  
101 Y V F G H S F C V I R G L A A E A S T N A S V L T  
376 ATAACTTTATTTACTGTAGAGAGATATTTAGCAATATGCCACCCGTTTTGTTTTCACATAAGATGTGAAAGCTTTCT  
126 I T L F T V E R Y L A I C H P F V S H K M S K L S  
451 CGAGCAACGAAGCATGTGATGTTTCTGTGGTGGCAGCAGTGGGGCTGGCGCTGCCACAAGCTTCGAGTTCGGG  
151 R A T K H V M F L W V A A V G L A L P Q A L Q F G  
526 CTCCTGGAGCACAGCGGAGTGACCATGTGCCTGCAGACGAGGGTTCATCATAGAACACTCGTTTGAAATCTCAACA  
176 L L E H S G V T M C L Q T R V I I E H S F E I S T  
601 TTTTCTTCTTCTTCGCGCCGATGATCCTCATCAGTGCTGTACTCACTGATAGGGCTGAAACTGAGAGAAACG  
201 F F F F F A P M I L I T V L Y S L I G L K L R E T  
676 AATATAAGCAAAGAACAGAGTCAGAAAGATTTTCGACACCAGTATGAGATACCCATAAAATCAGACGGAAACAT  
226 N I S K E Q S Q K D F D T S M R Y T H K I R R K H  
751 AGCCAGTCCACGAGGAGAGTCGTCAAATGTTAGTGGCAGTTGTCGTGGCGTTTTTCATTTGTTGGGCGCCTTTC  
251 S Q S T R R V V K M L V A V V V A F F I C W A P F  
826 CACGCTCAGCGTCTGGTCGCCATATACGGAACCACTGAGAACCATTACGCGCGCTCTCCGATCTCCTCCTCCGTC  
276 H A Q R L V A I Y G T T E N H Y A R S P I L L S V  
901 TACTCTCTGATTACGTACATTTCTGGAGTGTCTACTACATGTCCACGTGCATCAACCCAATATTCTACCACATC  
301 Y S L I T Y I S G V F Y Y M S T C I N P I F Y H I  
976 ATGTCCAATAAATTTAGGGACGCTTTCAAGAACTCCATGATGTTATGGTGCTGCCGCTCCAACGAGAAGGCGACG  
326 M S N K F R D A F K N S M M L W C C R S N E K A T  
1051 GCTAAGCGCTGCTCGTACACAGCTATGGCCTTTCAACGGAACCCCACTTCCAGCGGTACTGTAACTCAGGTAAT  
351 A K R C S Y T A M A F Q R N P T S S G T V N S G N  
1126 TCATTGAAAACTCATTGCGGCATGAGACGAGTATTGCTACAAGTCGCGTCTCACGACGTGCGGGACCGGTGTC  
376 S L K N S L R H E T S I R Y K S R P H D V R D R C  
1201 GTGCCACGGTGCACGTGTGCCACAACGGCAGGACCATCGTACGCGCCCTCCACGACTACAGGACCTGCAGC  
401 V P T V H V C H N G R T I V T P P L H D Y R T C S  
1276 AAGCACTCCTTCCAACAGCCATGAAGGAGGAAATCATCAATAACAGACACTCTACTTAGACACAGCAATGCGC  
426 K H S F Q H A M K E E I I N N R H S Y L D T A M R  
1351 CTCGGAACGAAAAGCGAAGACCTTGCTCGCCAGTGTGCTGCACCTACCCCTCGTCTCCAACCGAGACTATCACA  
451 L A N E K R R P C S P V C C T Y P S S P T E T I T  
1426 GTCACACCCGACGCGTTAATCAATAACATAGCAGAAGAAAAAGAGATTACTCCGACAGCAACCAGAGAAGTAC  
476 V T P D A L I N N I A E E K R D Y S A D E P E K Y  
1501 CTCAAAGAGATCAAGCTAAGAATAATACAACGTGAGAAAAGATATGGATAA  
501 L K E I K L R I I Q R E K E Y G \*
